# Supplementary material for: Thermostable fatty acid hydroxylases from ancestral reconstruction of cytochrome P450 family 4 enzymes
Source: Royal Society of Chemistry journal article supplement (doi:10.1039/d4cy00090k), 2024-01-01
Supplement: d4cy00090k1.pdf [file d4cy00090k1.pdf]

1 Supplementary information for:

2

3 **Thermostable fatty acid hydroxylases from ancestral reconstruction of**  
4 **cytochrome P450 family 4 enzymes**

5

6 Kurt L. Harris<sup>1</sup>, Yichi Zhang<sup>1</sup>, Jade Yang<sup>2</sup>, Maxwell B. Zeigler<sup>2</sup>, Raine E.S. Thomson<sup>1</sup>,  
7 Saskya E. Carrera-Pacheco<sup>3</sup>, Drake Russell<sup>2</sup>, Shoko Okada<sup>4</sup>, Silja J. Strohmaier<sup>1</sup>, Yosephine  
8 Gumulya<sup>1</sup>, Colin Scott<sup>4</sup>, Rheem A. Totah<sup>2</sup>, and Elizabeth M.J. Gillam<sup>1\*</sup>

9

10 <sup>1</sup> School of Chemistry and Molecular Biosciences, The University of Queensland, St. Lucia,  
11 Brisbane, 4072 Australia

12 <sup>2</sup> Department of Medicinal Chemistry, School of Pharmacy, University of Washington,  
13 Seattle, WA, 98195-7631, USA

14 <sup>3</sup> Centro de Investigación Biomédica (CENBIO), Facultad de Ciencias de la Salud Eugenio  
15 Espejo, Universidad UTE, Quito 170527, Ecuador

16 <sup>4</sup> CSIRO Synthetic Biology Future Science Platform, Black Mountain Science and Innovation  
17 Park, Clunies Ross St, Canberra, 2601, Australia

18

19 \*Corresponding author: [e.gillam@uq.edu.au](mailto:e.gillam@uq.edu.au)

20 **Supplementary Table 1.** Substrate and hydroxylation regioselectivities of mammalian CYP4 enzymes towards FAs

21 Common FA substrates of the CYP4s are listed, along with the forms that metabolise them and regioselectivities if known (in the form of

22 terminal to subterminal i.e.,  $\omega:\omega-1$  ratio, unless otherwise stated).

| FA Substrate                                                                                             | Form                                  | Regioselectivity | Source |
|----------------------------------------------------------------------------------------------------------|---------------------------------------|------------------|--------|
| Caprylic acid (C8)<br>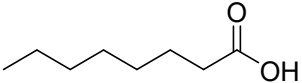  | Human CYP4B1 (S427P)<br>Rabbit CYP4B1 | >1.5:1<br>7.5:1  | 1      |
| Nonanoic acid (C9)<br>  | Human CYP4B1 (S427P)<br>Rabbit CYP4B1 | 1.6:1<br>1.4:1   | 1      |
| Capric acid (C10)<br> | Human CYP4B1 (S427P)<br>Rabbit CYP4B1 | 3.1:1<br>1.1:1   | 1      |
| Lauric acid (C12)                                                                                        | Rat CYP4A1                            | 40:1             | 2      |

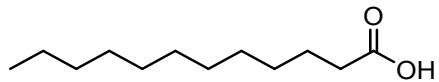

|  |                      |       |     |
|--|----------------------|-------|-----|
|  | Rat CYP4A8           | 25:1  |     |
|  | Rat CYP4A2           | >6:1  | 2,3 |
|  | Rat CYP4A3           | >3:1  |     |
|  | Rabbit CYP4A5        | 3:1   |     |
|  | Rabbit CYP4A6        | 12:1  | 4   |
|  | Rabbit CYP4A7        | 18:1  |     |
|  | Human CYP4A11        | >15:1 | 2,5 |
|  | Mouse CYP4A10        | 16:1  |     |
|  | Mouse CYP4A12a       | 5:1   | 6   |
|  | Mouse CYP4A12b       | 1:1.1 |     |
|  | Mouse CYP4A14        | 1.6:1 |     |
|  | Human CYP4B1 (S427P) | 1.2:1 | 1   |

|                                                                                                              |               |                     |   |
|--------------------------------------------------------------------------------------------------------------|---------------|---------------------|---|
|                                                                                                              | Rabbit CYP4B1 | 3.5:1               |   |
|                                                                                                              | Rat CYP4F4    | $\omega$            | 7 |
|                                                                                                              | Human CYP4Z1  | $\omega$ -4>(2,3,5) | 8 |
| <p>Myristic acid (C14)</p> 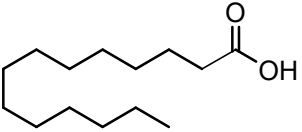 | Rat CYP4A1    | 3:1                 |   |
|                                                                                                              | Rat CYP4A2    | 3:1                 |   |
|                                                                                                              | Rat CYP4A3    | 1.2:1               | 2 |
|                                                                                                              | Rat CYP4A8    | 1.6:1               |   |
|                                                                                                              | Human CYP4A11 | 4:1                 |   |
|                                                                                                              | Human CYP4V2  | $\omega$ -2>(3,4,5) | 9 |
|                                                                                                              | Human CYP4Z1  | $\omega$ -2         | 8 |
| Palmitic acid (C16)                                                                                          | Rat CYP4A1    | 1:1                 | 2 |
|                                                                                                              | Rat CYP4A8    | 1.6:1               |   |

|                                                                                                                    |               |        |     |
|--------------------------------------------------------------------------------------------------------------------|---------------|--------|-----|
| 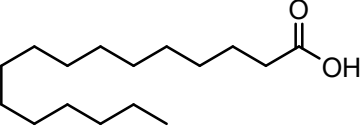                                  | Rabbit CYP4A4 | 4:1    |     |
|                                                                                                                    | Rabbit CYP4A5 | 1.4:1  | 4   |
|                                                                                                                    | Rabbit CYP4A6 | 2.7:1  |     |
|                                                                                                                    | Rabbit CYP4A7 | 2.5:1  |     |
|                                                                                                                    | Human CYP4A11 | >2.2:1 | 2,5 |
| <p>Arachidonic acid (C20:4)</p>  | Rat CYP4A1    | 6:1    |     |
|                                                                                                                    | Rat CYP4A2    | 2.4:1  | 2   |
|                                                                                                                    | Rat CYP4A3    | 2:1    |     |
|                                                                                                                    | Rabbit CYP4A4 | ∞      |     |
|                                                                                                                    | Rabbit CYP4A6 | ∞      | 4   |
|                                                                                                                    | Rabbit CYP4A7 | ∞      |     |
|                                                                                                                    | Human CYP4A11 | 3.7:1  | 5   |

|                |                      |       |
|----------------|----------------------|-------|
| xMouse CYP4A10 | 4:1                  |       |
| Mouse CYP4A12a | 7:1                  | 6     |
| Mouse CYP4A12b | 8:1                  |       |
| Rabbit CYP4B1  | $\omega$ -8          | 10-12 |
| Rat CYP4F1     | $\omega$             | 7     |
| Rat CYP4F4     | $\omega$             |       |
| Human CYP4F2   | 26:1                 | 13,14 |
| Human CYP4F3a  | 25:1                 | 14    |
| Human CYP4F3b  | 20:1                 |       |
| Human CYP4F8   | $\omega$ -2          | 15,16 |
| Human CYP4F12  | $\omega$ -2          | 16,17 |
| Human CYP4X1   | internal epoxidation | 18    |

|                                                                                                                        |                      |                                            |           |
|------------------------------------------------------------------------------------------------------------------------|----------------------|--------------------------------------------|-----------|
| <p>5-HETE</p> 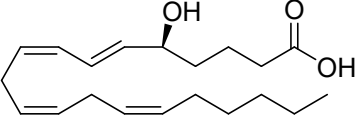                        | <p>Mouse CYP4A14</p> | <p><math>\omega</math></p>                 | <p>19</p> |
| <p>8-HETE</p>                         | <p>Human CYP4F2</p>  | <p><math>\omega</math></p>                 | <p>20</p> |
| <p>Prostaglandin H<sub>1</sub></p>  | <p>Human CYP4F8</p>  | <p><math>\omega-1 &gt; \omega-2</math></p> | <p>15</p> |
| <p>Prostaglandin H<sub>2</sub></p>                                                                                     | <p>Human CYP4F8</p>  | <p><math>\omega-1 &gt; \omega-2</math></p> | <p>15</p> |

|                                                                                                                       |                                |                    |   |
|-----------------------------------------------------------------------------------------------------------------------|--------------------------------|--------------------|---|
| 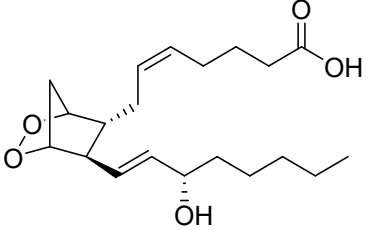                                     |                                |                    |   |
| <p>Prostaglandin E<sub>1</sub></p>   | Rabbit CYP4A4                  | ω                  | 4 |
| <p>Prostaglandin A<sub>1</sub></p>  | Rabbit CYP4A4<br>Rabbit CYP4A7 | ω                  | 4 |
| Eicosapentaenoic acid (C20:5)                                                                                         | Mouse CYP4A12a                 | (ω-2, ω-3)-epoxide | 6 |



|                                                                                                                                      |                |                          |    |
|--------------------------------------------------------------------------------------------------------------------------------------|----------------|--------------------------|----|
| 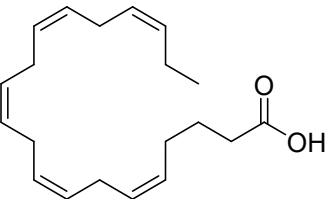                                                    | Mouse CYP4A12b |                          |    |
|                                                                                                                                      | Human CYP4F3a  | 2:1                      | 14 |
|                                                                                                                                      | Human CYP4F3b  | 1.7:1                    |    |
|                                                                                                                                      | Human CYP4V2   | $\omega > \omega - 1$    | 9  |
| <p>Leukotriene B<sub>4</sub> (C<sub>20</sub>)</p>  | Rat CYP4F1     | $\omega$                 | 7  |
|                                                                                                                                      | Rat CYP4F4     | $\omega$                 |    |
|                                                                                                                                      | Rat CYP4F5     | $\omega - 2$             | 21 |
|                                                                                                                                      | Rat CYP4F6     | $\omega - 1, \omega - 2$ | 21 |
|                                                                                                                                      | Human CYP4F2   | $\omega$                 | 20 |
|                                                                                                                                      | Human CYP4F3a  | $\omega$                 | 22 |
|                                                                                                                                      | Human CYP4F3b  | $\omega$                 |    |
|                                                                                                                                      | Mouse CYP4F14  | $\omega$                 | 19 |

|                                                                                                                         |               |                                    |    |
|-------------------------------------------------------------------------------------------------------------------------|---------------|------------------------------------|----|
|                                                                                                                         | Mouse CYP4F18 | $\omega$ -1> $\omega$ -2           | 23 |
| <p>Lipoxin A<sub>4</sub></p> 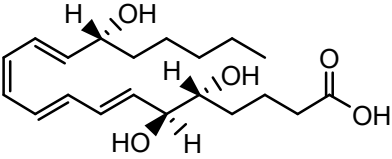          | Rat CYP4F1    | $\omega$                           | 24 |
|                                                                                                                         | Human CYP4F2  | $\omega$                           | 20 |
|                                                                                                                         | Mouse CYP4A14 | $\omega$                           | 19 |
| <p>Docosapentaenoic acid (C22:5)</p>   | Human CYP4F8  | $(\omega$ -2, $\omega$ -3)-epoxide | 16 |
| Human CYP4F12                                                                                                           |               |                                    |    |
| <p>Docosahexaenoic acid (C22:6)</p>  | Human CYP4F3a | 1.1:1                              | 14 |
|                                                                                                                         | Human CYP4F3b | 2.1:1                              |    |
|                                                                                                                         | Human CYP4F12 | $(\omega$ -2, $\omega$ -3)-epoxide | 16 |
|                                                                                                                         | Human CYP4V2  | $\omega$ -1> $\omega$ -2           | 9  |

Anandamide (C22)

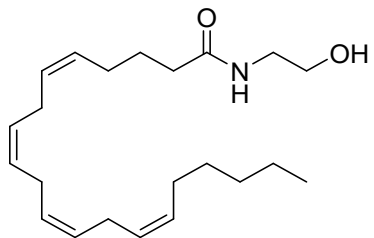

Human CYP4X1

internal epoxidation

18

23

24

25 **Supplementary Table 2. N-terminal modifications used for CYP4 expression**

26 The known N-terminal modifications applied to extant members of the CYP4ABTXZ clade (hCYP4A11<sup>25</sup>, rCYP4B1<sup>26</sup>, hCYP4X1<sup>18</sup>) to facilitate  
 27 recombinant expression in *E. coli* are compared with the corresponding native form of each sequence as well as the unmodified “native”  
 28 sequences for each node of interest. The existing N-terminal modifications in the literature were used to help identify possible modifications to  
 29 apply to each ancestor. Ultimately, the hCYP4A11-like modification was applied to CYP4ABTXZ, as the hCYP4A11 sequence showed the  
 30 greatest sequence similarity (77%) to the ancestor. The rCYP4B1-like modification was applied to all intermediate nodes, as this sequence  
 31 retained the greatest length of native sequence, allowing for subsequent shortening to apply alternative N-terminal modifications if required for  
 32 expression.

| Form              | N-terminal sequence                                                  | Reference |
|-------------------|----------------------------------------------------------------------|-----------|
| hCYP4A11_Native   | LLGDVSGILQAASLLILLLLLLIKAVQLYLHRQWLLKALQQFPCPPSHWLF <sup>27</sup> GH | 27        |
| hCYP4A11_Modified | -----MALLLAVFLLLLLIKAVQLYLHRQWLLKALQQFPCPPSHWLF <sup>25</sup> GH     | 25        |
| rCYP4B1_Native    | MLGFLSRLGLWASGLILILGFLKLLRLLRRQRLARAMDSFPGPPTHWLF <sup>28</sup> GH   | 28        |
| rCYP4B1_Modified  | MALLLAVFGLWASGLILILGFLKLLRLLRRQRLARAMDSFPGPPTHWLF <sup>26</sup> GH   | 26        |
| hCYP4X1_Native    | LETRWARPFYLA <sup>29</sup> VFVCLALGLLQAIKLYLRRQRLRLDLRPFAPPTHWFLGH   | 29        |
| hCYP4X1_Modified  | -----MAKKTSSKGKL-PFPAPPTHWFL <sup>18</sup> GH                        | 18        |
| CYP4ABTXZ_Native  | -----LALLLLKAIQLYLRRQRLRLRALQLFPGPPTHWLYGH                           |           |

CYP4ABTXZ\_Modified (4A11-like) -----MALLLAVFLALLLLKAIQLYLRRQRLLRALQLFPGPPTHWLYGH  
 CYP4ABTXZ\_Modified (4B1-like) MALLLAVFGLWASGLILALLLLKAIQLYLRRQRLLRALQLFPGPPTHWLYGH  
 CYP4ABTXZ\_Modified (4X1-like) -----MAKKTSSKGKLQLFPGPPTHWLYGH  
 CYP4B\_Native -----LTLVLLKAIQLYLRRQKLLKALESFPGPPTHWLYGH  
 CYP4B\_Modified (4B1-like) MALLLAVFGLWASGLILTLVLLKAIQLYLRRQKLLKALESFPGPPTHWLYGH  
 CYP4A\_Native -----LVLLLLKAAQLYLRRQRLLRALRAFQSFPGPPAHWLYGH  
 CYP4A\_Modified (4A11-like) -----MALLLAVFLVLLLLKAAQLYLRRQRLLRALRAFQSFPGPPAHWLYGH  
 CYP4A\_Modified (4B1-like) MALLLAVFGLWASGLILVLLLLKAAQLYLRRQRLLRALRAFQSFPGPPAHWLYGH  
 CYP4XZ\_Native -----LALLLLQAIKLYLRRQRLLRALRLFPGPPTHWLYGH  
 CYP4XZ\_Modified (4X1-like) -----MAKKTSSKGKLRLFPGPPTHWLYGH  
 CYP4XZ\_Modified (4B1-like) MALLLAVFGLWASGLILALLLLQAIKLYLRRQRLLRALRLFPGPPTHWLYGH

33

34

35

36

37

38 **Supplementary Table 3.** Mass transitions used to detect the AA metabolites and the internal

| <b>Fatty Acid</b> | <b>Mass Transition</b> |
|-------------------|------------------------|
| 20- HETE          | 487>183.1              |
| 19- HETE          | 487>183                |
| 15- HETE          | 487>183                |
| 12-HETE           | 487>347                |
| 11- HETE          | 487>335                |
| 9- HETE           | 487>307                |
| 5-HETE            | 487>283                |
| 14,15- EET        | 487>333                |
| 11,12- EET        | 487>333                |
| 8,9- EET          | 487>307                |
| 5,6- EET          | 487>283                |
| 12- HETE d8       | 495>183.1              |
| 14,15- EET d11    | 498>183.1              |
| 8,9- EET d11      | 498>183.1              |
| 5,6- EET d11      | 498>183.1              |

39 standards.

40

41

42

43

44

45 **Supplementary Table 4.** Estimated limit of detection (LOD) and limit of quantitation (LOQ)

46 for the measured EETs and HETEs

|                                        | <b>5,6-<br/>EET</b> | <b>8,9-<br/>EET</b> | <b>11,12-<br/>EET</b> | <b>14,15-<br/>EET</b> | <b>5-<br/>HETE</b> | <b>9-<br/>HETE</b> | <b>8-<br/>HETE</b> | <b>12-<br/>HETE</b> | <b>11-<br/>HETE</b> | <b>15-<br/>HETE</b> | <b>19-<br/>HETE</b> | <b>20-<br/>HETE</b> |
|----------------------------------------|---------------------|---------------------|-----------------------|-----------------------|--------------------|--------------------|--------------------|---------------------|---------------------|---------------------|---------------------|---------------------|
| <b>LOD<br/>(fmol/mL;<br/>S/N = 3)</b>  | 1597                | 349                 | 127                   | 57                    | 343                | 179                | 61                 | 167                 | 121                 | 45                  | 89                  | 43                  |
| <b>LOQ<br/>(fmol/mL;<br/>S/N = 10)</b> | 5324                | 1164                | 423                   | 190                   | 545                | 598                | 202                | 558                 | 405                 | 150                 | 297                 | 144                 |

47





49 **Supplementary Figure 1. Multiple sequence alignment of the CYP4 ancestors**  
50 **and corresponding extant forms.**

51 The figure was created using ENDscript 3.0<sup>30</sup>. Red boxes indicate amino acid identity, red  
52 characters indicate similarity, and blue frames surround regions of homology. The secondary  
53 structure of rCYP4B1 is represented above the alignment in blue, with  $\alpha$ -helices depicted as  
54 coils and  $\beta$ -sheets as arrows. Residue numbering is with respect to the numbering used for the  
55 rCYP4B1 crystal structure (PDB: 5T6Q).

56

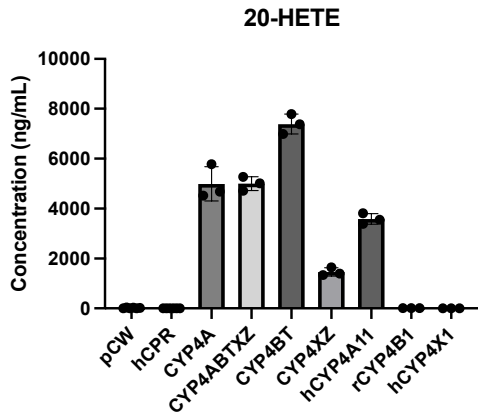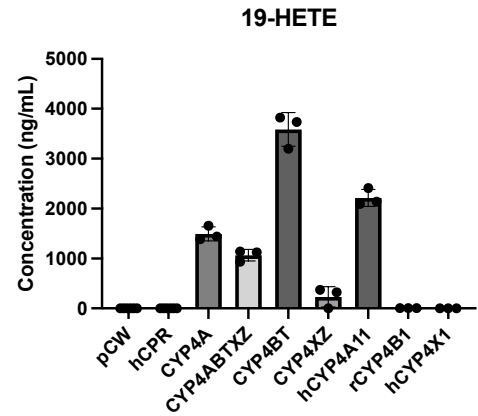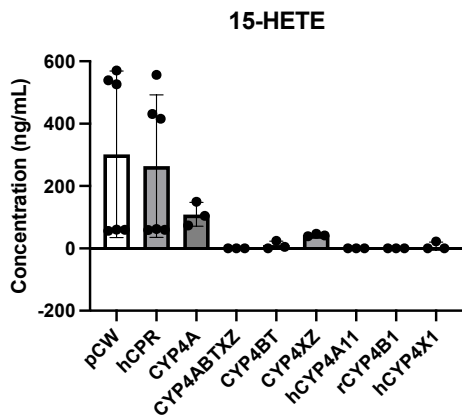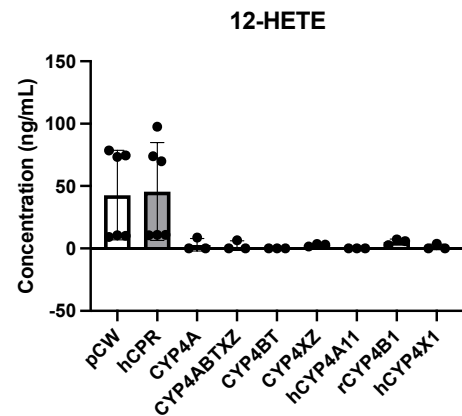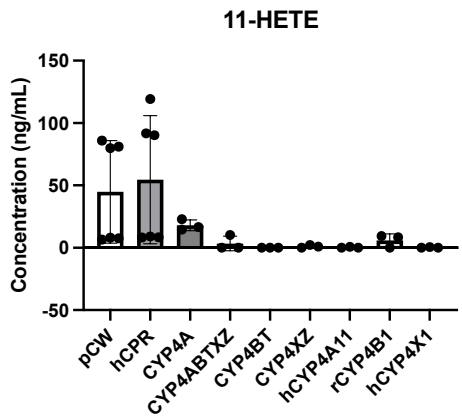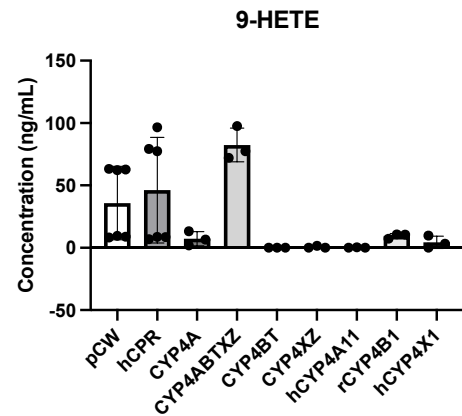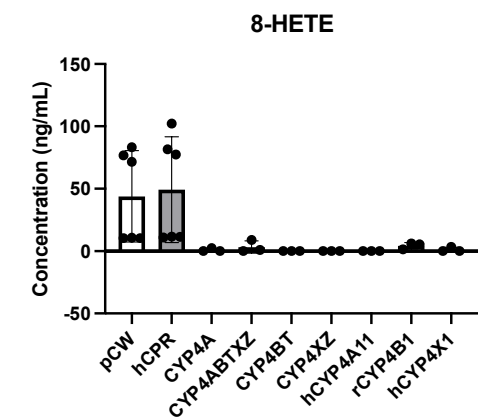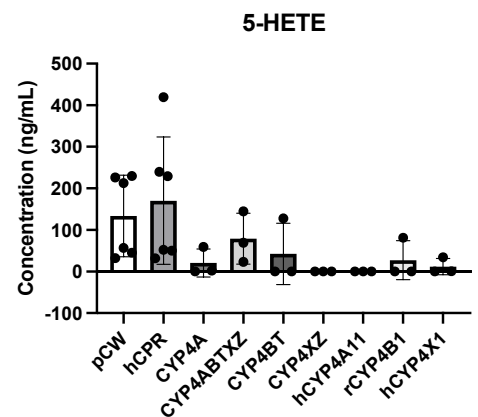

58 **Supplementary Figure 2.** HETE formation by ancestral and extant CYP4s  
59 Incubations of the ancestral and extant CYP4s with AA were carried out and metabolites  
60 were analyzed with LC-MS. The data presented are the means +/- SD of three technical  
61 replicates for all CYPs and six technical replicates for CYP-free controls (data points  
62 collected on two separate days) .  
63

64

65

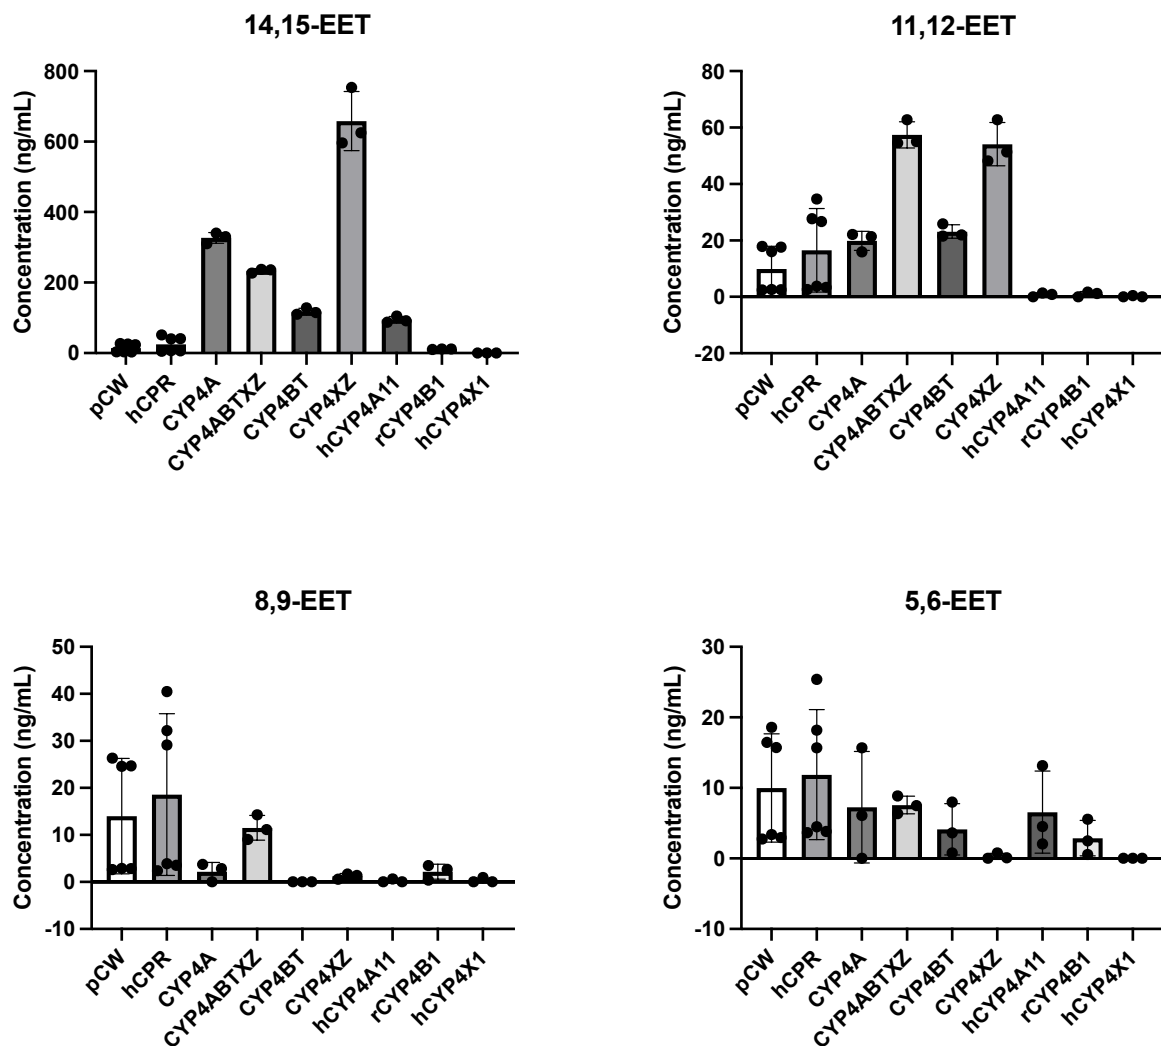

66

67 **Supplementary Figure 3.** EET formation by ancestral and extant CYP4s.

68 Incubations of the ancestral and extant CYP4s with AA were carried out and metabolites

69 were analyzed with LC-MS. The data presented are the means +/- SD of three technical

70 replicates for all CYPs and six technical replicates for CYP-free controls (data points

71 collected on two separate days).

72

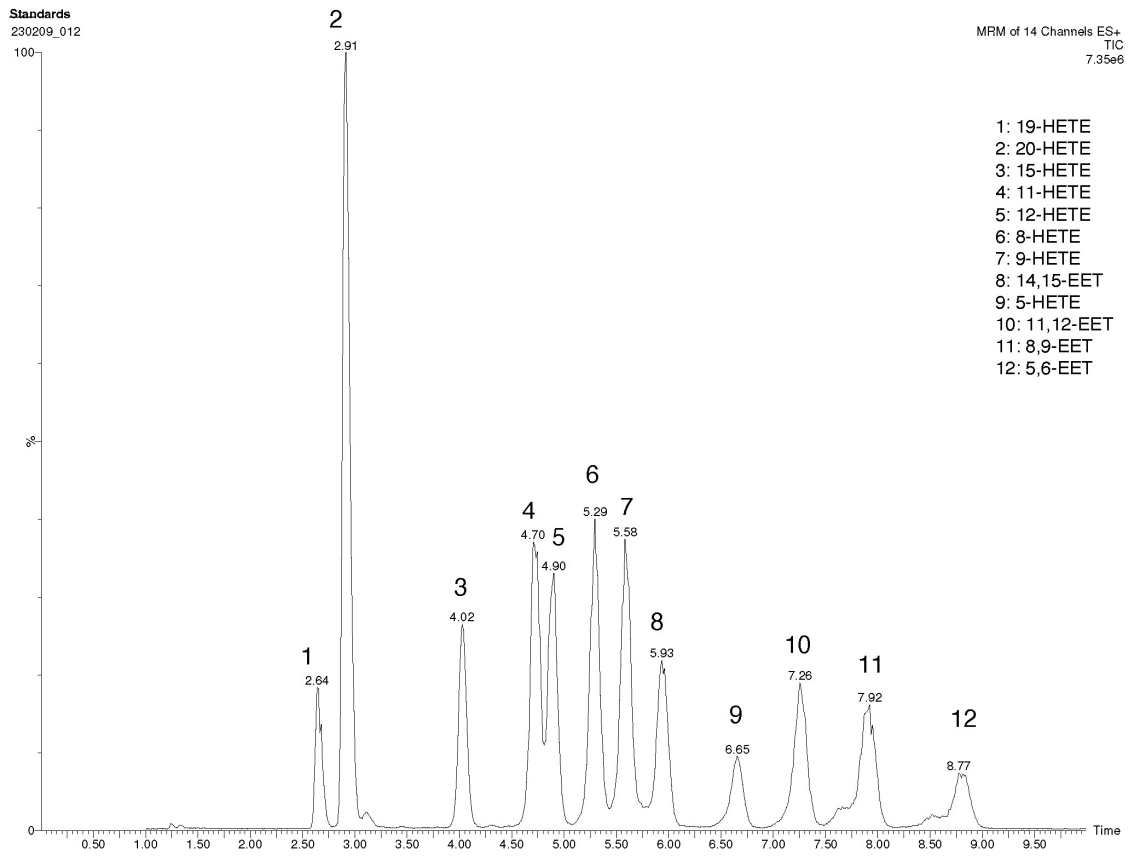

73  
74 **Supplementary Figure 4.** Representative LC-MS chromatogram of AA metabolites in a  
75 standard showing chromatographic separation.

76

77

78

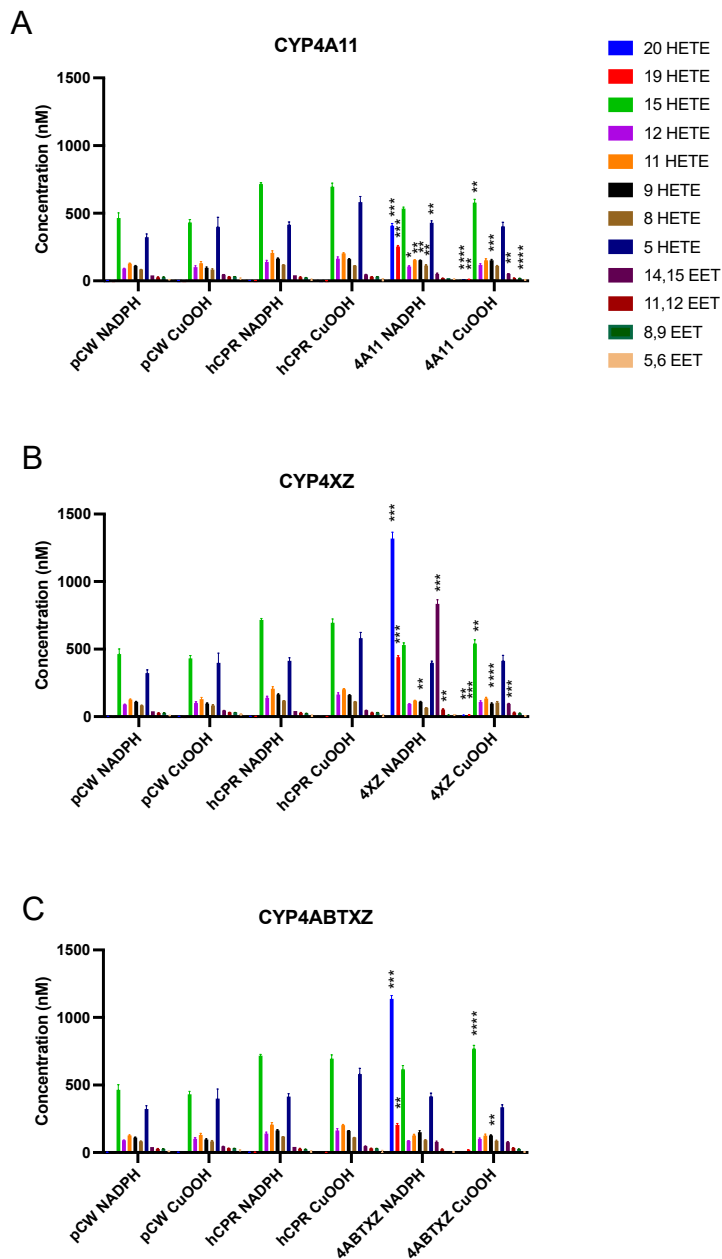

80

81 **Supplementary Figure 5. AA oxidation by CYP4A11 (A), CYP4XZ (B), and**  
 82 **CYP4ABTXZ (C).** The data presented are the concentrations of 5-, 8-, 9-, 11-, 12-, 15-, 19-,  
 83 and 20- HETE and 5,6-; 8,9-; 11,12-; and 14,15- EET from AA incubations in the presence of  
 84 NADPH or CuOOH. Asterisks indicate statistical significance compared to respective  
 85 NADPH or CuOOH pCW control for each metabolite using an unpaired t-test (\* $p < 0.05$ ; \*\*  
 86  $p \leq 0.01$ , \*\*\* $p \leq 0.001$ , \*\*\*\* $p \leq 0.0001$ ).

A

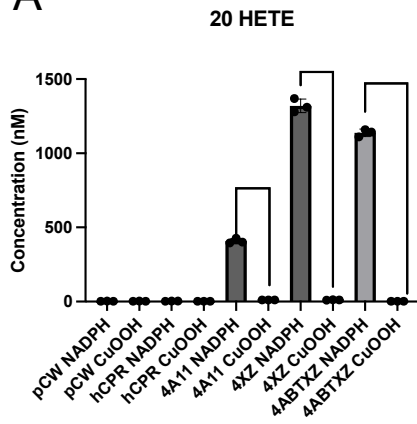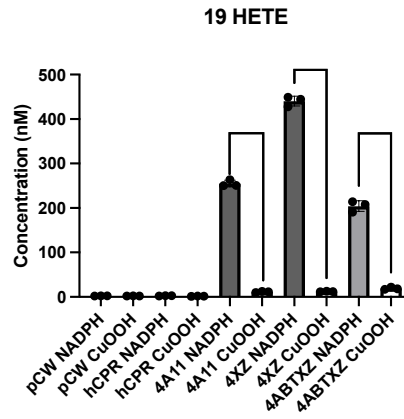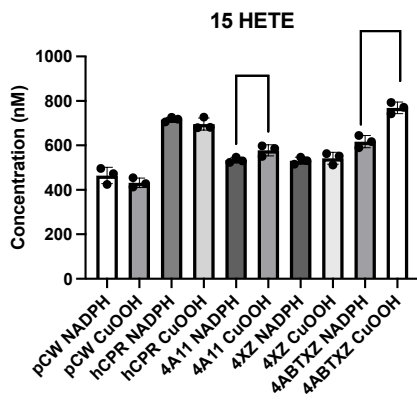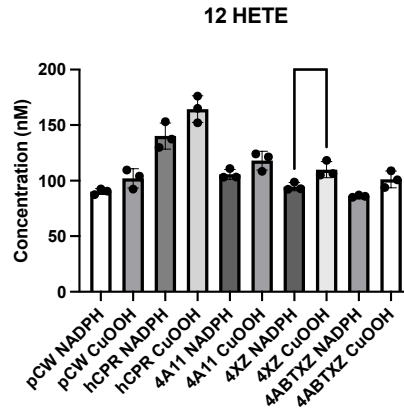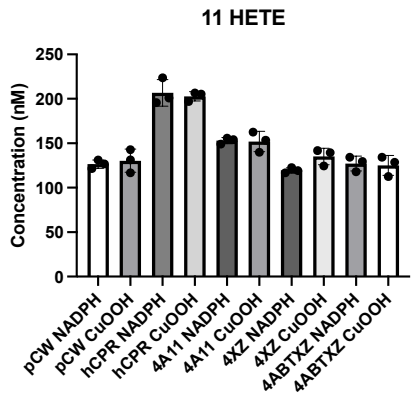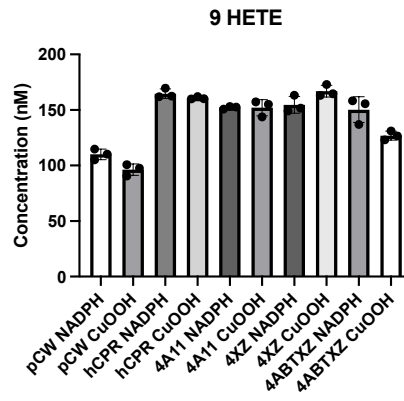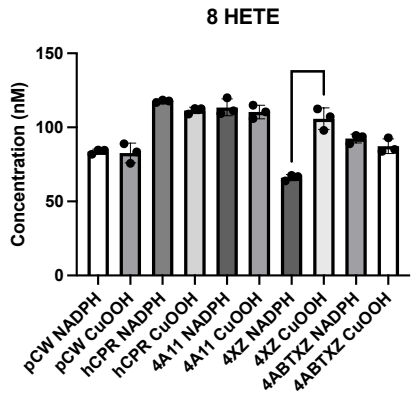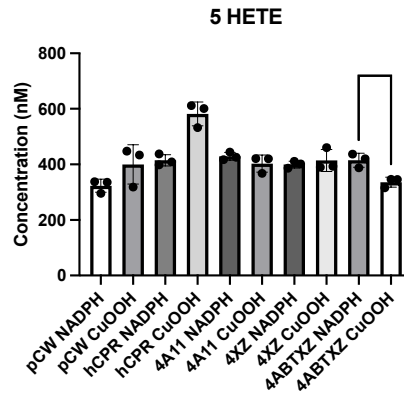

87

88

89

B

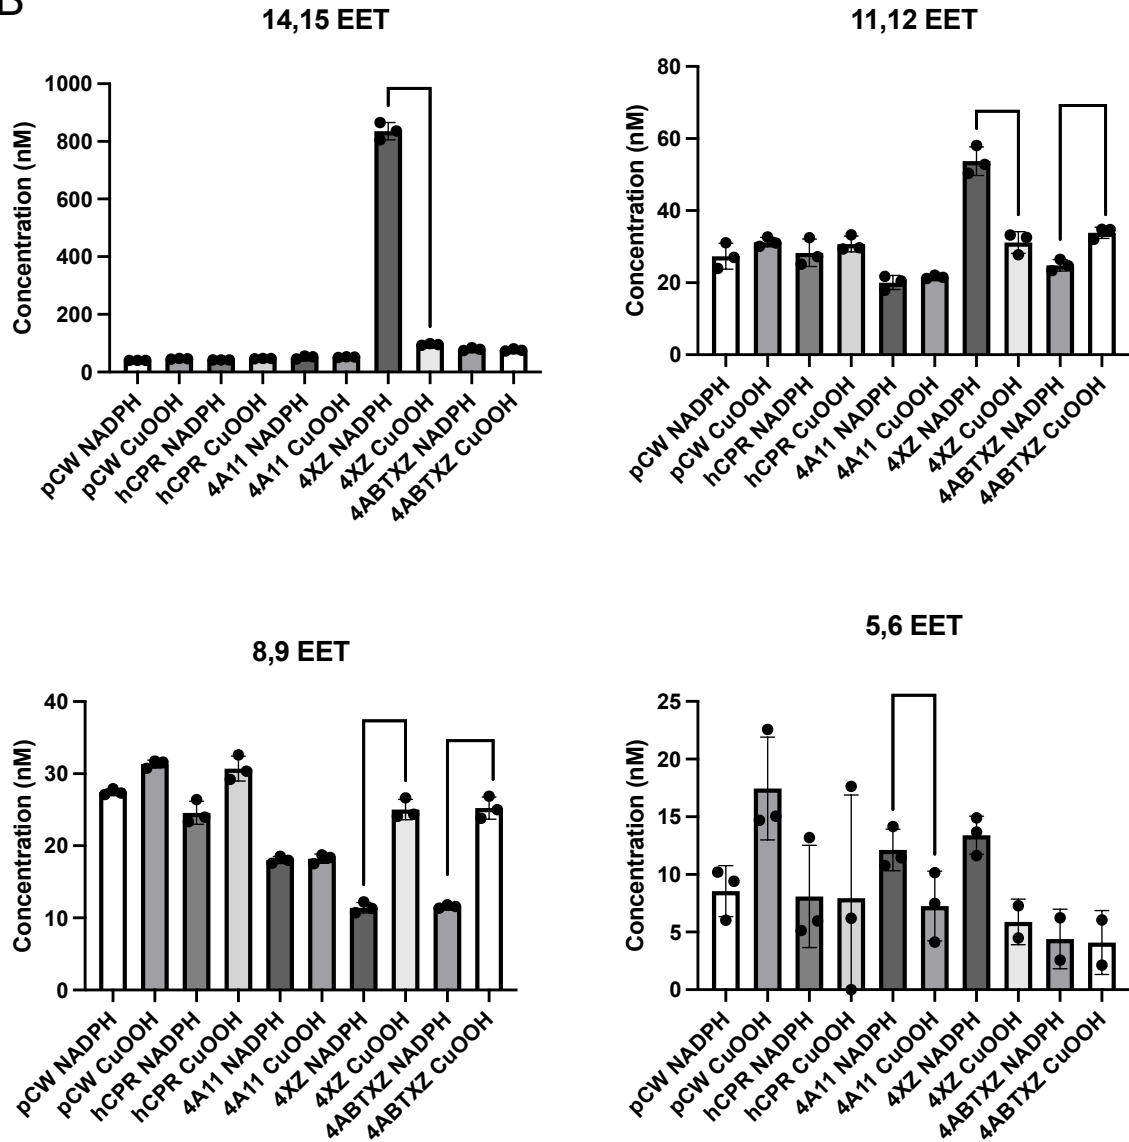

90

91

92 **Supplementary Figure 6. Differences in AA metabolite formation between a standard**

93 **NGS and O<sub>2</sub> surrogate (CuOOH).** HETE (A) and EET (B) AA oxidation products were

94 quantified via LC-MS/MS. Asterisks indicate statistically significant differences in the

95 amount of metabolite formed between NADPH and CUOOH incubation conditions using a

96 one-tailed, t-test (\* $p < 0.05$ ; \*\* $p \leq 0.01$ , \*\*\* $p \leq 0.001$ , \*\*\*\* $p \leq 0.0001$ ).

97



98

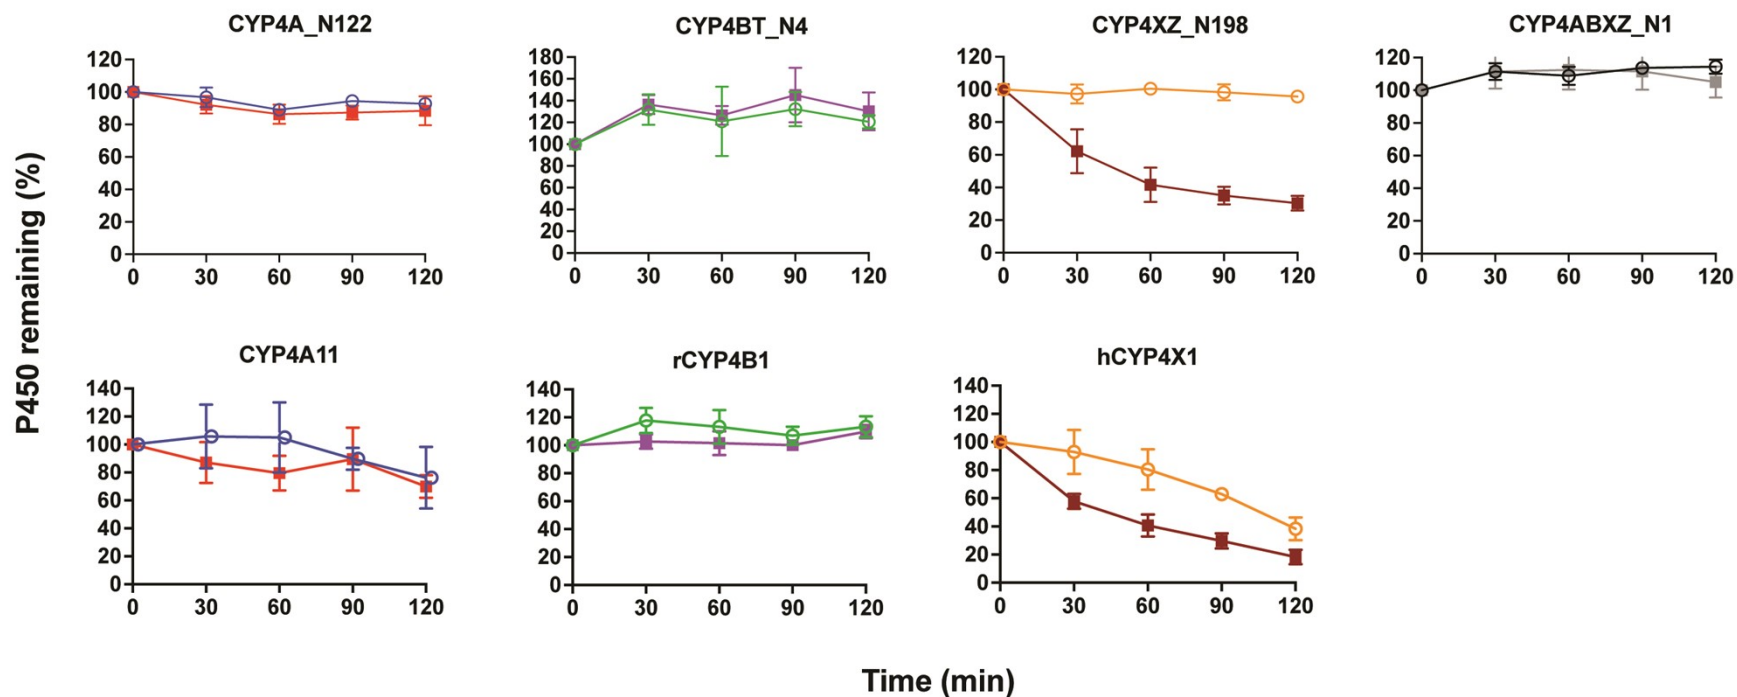

99

100 **Supplementary Figure 7. Stability of extant and ancestral P450s to incubation with CuOOH.** Bacterial membrane preparations containing  
 101 0.6-1.0  $\mu\text{M}$  of the P450s indicated were incubated with 500  $\mu\text{M}$  CuOOH in 100 mM potassium phosphate buffer, pH 7.4. At the times indicated,  
 102 aliquots of incubations were removed and the residual P450 hemoprotein concentration was quantified by Fe(II).CO vs. Fe(II) difference  
 103 spectroscopy. Data represent the mean  $\pm$  SD of n=3 replicates.

104

## 105 References

- 106 1 Zheng, Y.-M., Fisher, M. B., Yokotani, N., Fujii-Kuriyama, Y. & Rettie, A. E.  
107 Identification of a meander region proline residue critical for heme binding to  
108 cytochrome P450: Implications for the catalytic function of human CYP4B1.  
109 *Biochemistry* **37**, 12847-12851, doi:10.1021/bi981280m (1998).
- 110 2 Hoch, U., Zhang, Z., Kroetz, D. L. & Ortiz de Montellano, P. R. Structural  
111 determination of the substrate specificities and regioselectivities of the rat and human  
112 fatty acid  $\omega$ -hydroxylases. *Arch. Biochem. Biophys.* **373**, 63-71,  
113 doi:<http://dx.doi.org/10.1006/abbi.1999.1504> (2000).
- 114 3 Helvig, C., Dishman, E. & Capdevila, J. H. Molecular, enzymatic, and regulatory  
115 characterization of rat kidney cytochromes P450 4A2 and 4A3. *Biochemistry* **37**,  
116 12546-12558, doi:10.1021/bi981048g (1998).
- 117 4 Roman, L. J. *et al.* Expression of rabbit cytochromes P4504A which catalyze the  $\omega$ -  
118 hydroxylation of arachidonic acid, fatty acids, and prostaglandins. *Arch. Biochem.*  
119 *Biophys.* **307**, 57-65, doi:<https://doi.org/10.1006/abbi.1993.1560> (1993).
- 120 5 Palmer, C. N. *et al.* Characterization of a cDNA encoding a human kidney,  
121 cytochrome P-450 4A fatty acid omega-hydroxylase and the cognate enzyme  
122 expressed in Escherichia coli. *Biochim. Biophys. Acta* **1172**, 161-166 (1993).
- 123 6 Muller, Dominik N. *et al.* Mouse CYP4A isoforms: enzymatic properties, gender- and  
124 strain-specific expression, and role in renal 20-hydroxyeicosatetraenoic acid  
125 formation. *Biochem. J.* **403**, 109-118, doi:10.1042/bj20061328 (2007).
- 126 7 Xu, F., Falck, J. R., Ortiz de Montellano, P. R. & Kroetz, D. L. Catalytic Activity and  
127 Isoform-Specific Inhibition of Rat Cytochrome P450 4F Enzymes. *J. Pharmacol. Exp.*  
128 *Ther.* **308**, 887, doi:10.1124/jpet.103.059626 (2004).

- 129 8 Zöllner, A. *et al.* Human CYP4Z1 catalyzes the in-chain hydroxylation of lauric acid  
130 and myristic acid. *Biol. Chem.* **390**, 313, doi:10.1515/BC.2009.030 (2009).
- 131 9 Nakano, M., Kelly, E. J., Wiek, C., Hanenberg, H. & Rettie, A. E. CYP4V2 in Bietti's  
132 crystalline dystrophy: ocular localization, metabolism of  $\omega$ -3-polyunsaturated fatty  
133 acids, and functional deficit of the p.H331P variant. *Mol. Pharmacol.* **82**, 679-686,  
134 doi:10.1124/mol.112.080085 (2012).
- 135 10 Ashkar, S. *et al.* Retinoic acid induces corneal epithelial CYP4B1 gene expression  
136 and stimulates the synthesis of inflammatory 12-hydroxyeicosanoids. *J. Ocul.*  
137 *Pharmacol. Ther.* **20**, 65-74, doi:10.1089/108076804772745473 (2004).
- 138 11 Vafeas, C. *et al.* Hypoxia stimulates the synthesis of cytochrome P450-derived  
139 inflammatory eicosanoids in rabbit corneal epithelium. *J. Pharmacol. Exp. Ther.* **287**,  
140 903-910 (1998).
- 141 12 Mastuyugin, V. *et al.* Hypoxia-induced production of 12-hydroxyeicosanoids in the  
142 corneal epithelium: involvement of a cytochrome P-450 4B1 isoform. *J. Pharmacol.*  
143 *Exp. Ther.* **289**, 1611-1619 (1999).
- 144 13 Powell, P. K., Wolf, I., Jin, R. & Lasker, J. M. Metabolism of arachidonic acid to 20-  
145 hydroxy-5,8,11,14-eicosatetraenoic acid by P450 Enzymes in human liver:  
146 Involvement of CYP4F2 and CYP4A11. *J. Pharmacol. Exp. Ther.* **285**, 1327-1336  
147 (1998).
- 148 14 Fer, M. *et al.* Cytochromes P450 from family 4 are the main omega hydroxylating  
149 enzymes in humans: CYP4F3B is the prominent player in PUFA metabolism. *J. Lipid*  
150 *Res.* **49**, 2379-2389, doi:10.1194/jlr.M800199-JLR200 (2008).
- 151 15 Bylund, J., Hidestrand, M., Ingelman-Sundberg, M. & Oliw, E. H. Identification of  
152 CYP4F8 in human seminal vesicles as a prominent 19-hydroxylase of prostaglandin

153 endoperoxides. *J. Biol. Chem.* **275**, 21844-21849, doi:10.1074/jbc.M001712200  
154 (2000).

155 16 Stark, K., Wongsud, B., Burman, R. & Oliw, E. H. Oxygenation of polyunsaturated  
156 long chain fatty acids by recombinant CYP4F8 and CYP4F12 and catalytic  
157 importance of Tyr-125 and Gly-328 of CYP4F8. *Arch Biochem Biophys* **441**, 174-  
158 181, doi:10.1016/j.abb.2005.07.003 (2005).

159 17 Bylund, J., Bylund, M. & Oliw, E. H. cDNA cloning and expression of CYP4F12, a  
160 novel human cytochrome P450. *Biochem. Biophys. Res. Comm.* **280**, 892-897,  
161 doi:<https://doi.org/10.1006/bbrc.2000.4191> (2001).

162 18 Stark, K., Dostalek, M. & Guengerich, F. P. Expression and purification of orphan  
163 cytochrome P450 4X1 and oxidation of anandamide. *FEBS J.* **275**, 3706-3717,  
164 doi:10.1111/j.1742-4658.2008.06518.x (2008).

165 19 Kikuta, Y., Kasyu, H., Kusunose, E. & Kusunose, M. Expression and catalytic  
166 activity of mouse leukotriene B4  $\omega$ -hydroxylase, CYP4F14. *Arch. Biochem. Biophys.*  
167 **383**, 225-232, doi:<https://doi.org/10.1006/abbi.2000.2078> (2000).

168 20 Kikuta, Y., Kusunose, E. & Kusunose, M. Characterization of human liver leukotriene  
169 B4  $\omega$ -hydroxylase P450 (CYP4F2). *J. Biochem.* **127**, 1047-1052,  
170 doi:10.1093/oxfordjournals.jbchem.a022696 (2000).

171 21 Bylund, J., Harder, A. G., Maier, K. G., Roman, R. J. & Harder, D. R. Leukotriene B4  
172  $\omega$ -side chain hydroxylation by CYP4F5 and CYP4F6. *Arch. Biochem. Biophys.* **412**,  
173 34-41, doi:[https://doi.org/10.1016/S0003-9861\(03\)00030-4](https://doi.org/10.1016/S0003-9861(03)00030-4) (2003).

174 22 Christmas, P. *et al.* Alternative splicing determines the function of CYP4F3 by  
175 switching substrate specificity. *J. Biol. Chem.* **276**, 38166-38172,  
176 doi:10.1074/jbc.M104818200 (2001).

177 23 Christmas, P. *et al.* CYP4F18 is the LTB4 omega-1/omega-2 hydroxylase in mouse  
178 polymorphonuclear leukocytes: Identification as the functional orthologue of human  
179 PMN CYP4F3A in the down-regulation of responses to LTB4. *J. Biol. Chem.* (2005).

180 24 Kikuta, Y., Kusunose, E., Ito, M. & Kusunose, M. Purification and characterization of  
181 recombinant rat hepatic CYP4F1. *Arch Biochem Biophys* **369**, 193-196,  
182 doi:10.1006/abbi.1999.1271 (1999).

183 25 Songhee, H. A. N. *et al.* Self-sufficient catalytic system of human cytochrome P450  
184 4A11 and NADPH-P450 reductase. *Biomol. Ther.* **17**, 156-161 (2009).

185 26 Cheesman, M. J., Baer, B. R., Zheng, Y.-M., Gillam, E. M. J. & Rettie, A. E. Rabbit  
186 CYP4B1 engineered for high-level expression in Escherichia coli: ligand stabilization  
187 and processing of the N-terminus and heme prosthetic group. *Arch. Biochem.*  
188 *Biophys.* **416**, 17-24, doi:[http://dx.doi.org/10.1016/S0003-9861\(03\)00278-9](http://dx.doi.org/10.1016/S0003-9861(03)00278-9) (2003).

189 27 Bellamine, A. *et al.* Characterization of the CYP4A11 gene, a second CYP4A gene in  
190 humans. *Arch. Biochem. Biophys.* **409**, 221-227, doi:[https://doi.org/10.1016/S0003-](https://doi.org/10.1016/S0003-9861(02)00545-3)  
191 [9861\(02\)00545-3](https://doi.org/10.1016/S0003-9861(02)00545-3) (2003).

192 28 Gasser, R. & Philpot, R. M. Primary structures of cytochrome P-450 isozyme 5 from  
193 rabbit and rat and regulation of species-dependent expression and induction in lung  
194 and liver: Identification of cytochrome P-450 gene subfamily IVB. *Mol. Pharmacol.*  
195 **35**, 617-625 (1989).

196 29 Strausberg, R. L. *et al.* Generation and initial analysis of more than 15,000 full-length  
197 human and mouse cDNA sequences. *Proc. Natl. Acad. Sci. U.S.A.* **99**, 16899-16903,  
198 doi:10.1073/pnas.242603899 (2002).

199 30 Gouet, P. & Robert, X. Deciphering key features in protein structures with the new  
200 ENDscript server. *Nucl. Acids Res.* **42**, W320-W324, doi:10.1093/nar/gku316 (2014).

201
